# Supplementary material for: Obesity-related hypoxia via miR-128 decreases insulin-receptor expression in human and mouse adipose tissue promoting systemic insulin resistance
Source: PubMed Central journal article supplement — eBioMedicine. 2020 Jul 29;59:102912. doi: 10.1016/j.ebiom.2020.102912 (PMC7502675; doi:10.1016/j.ebiom.2020.102912), 2020-07-29
Supplement: mmc1.pdf [file mmc1.pdf]

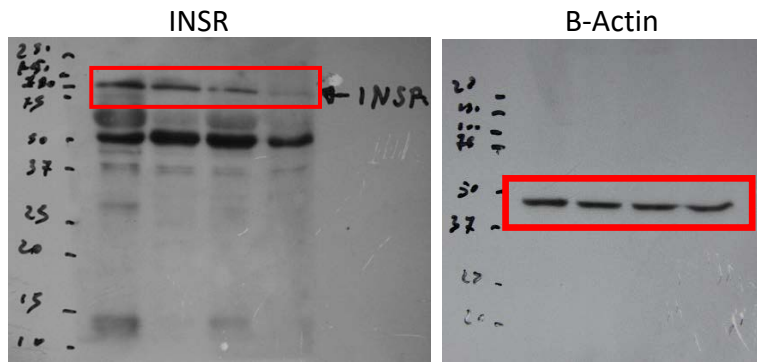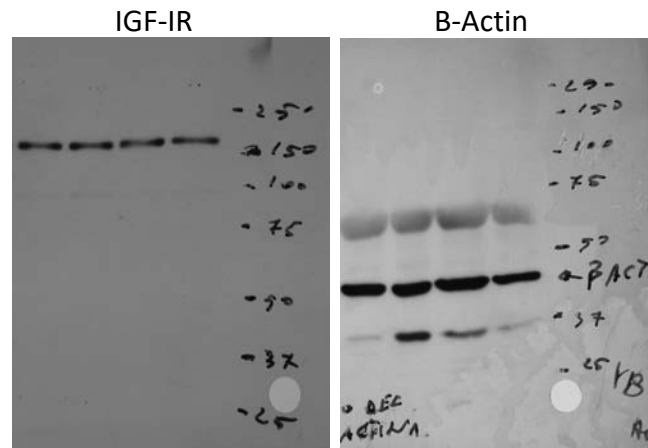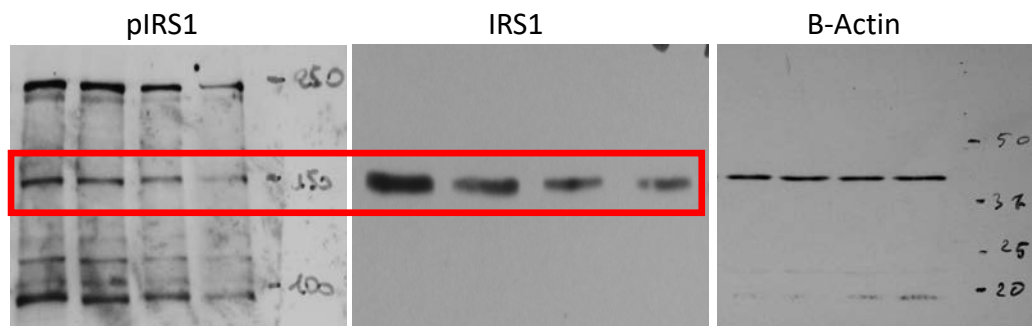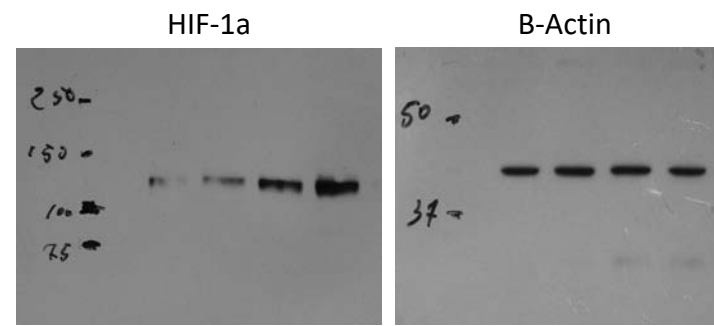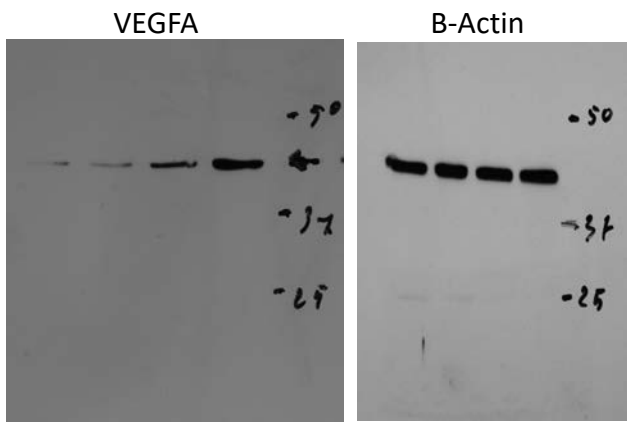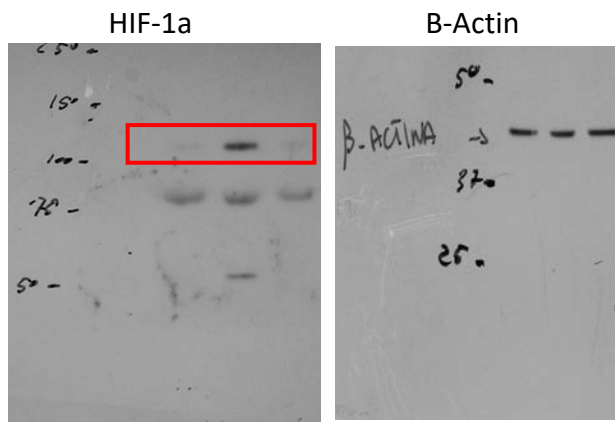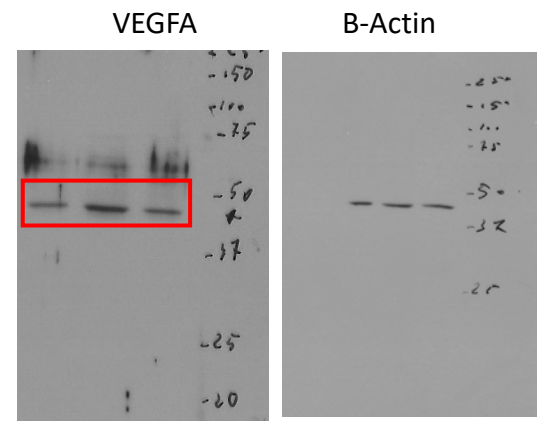

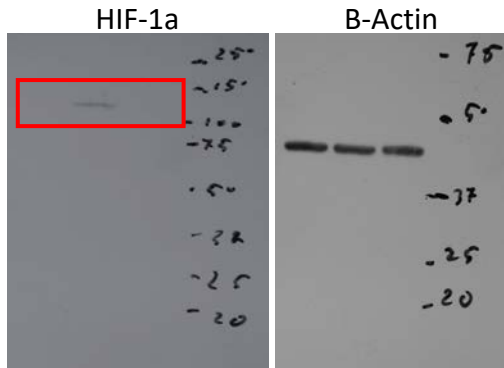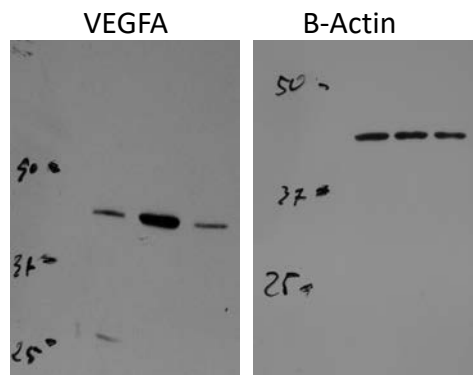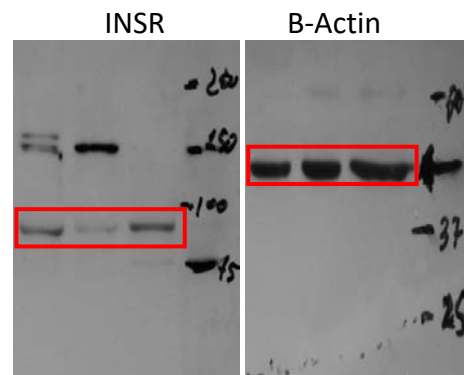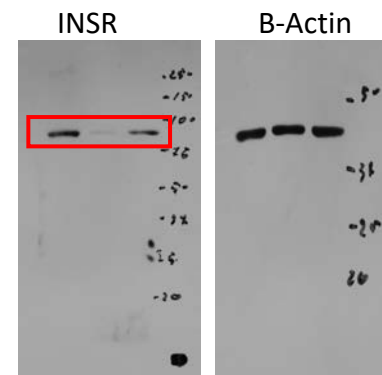

Fig. 2c left

Fig. 2c right

Fig. 2d left

Fig. 2d right

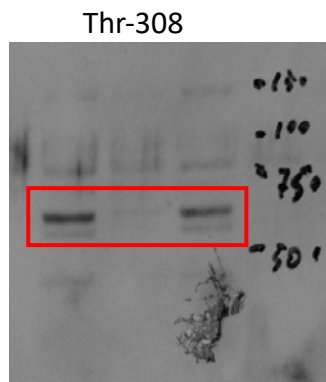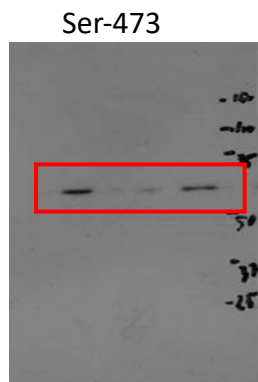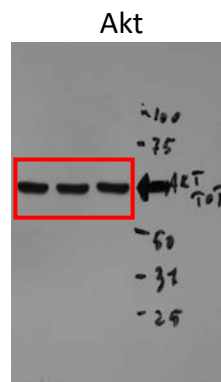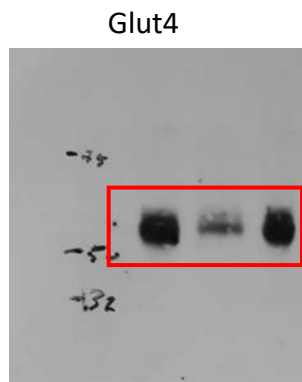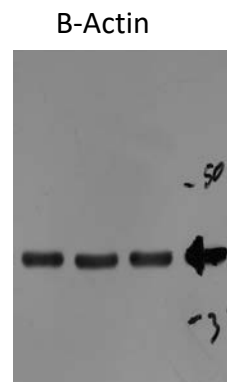

Fig. 2e left

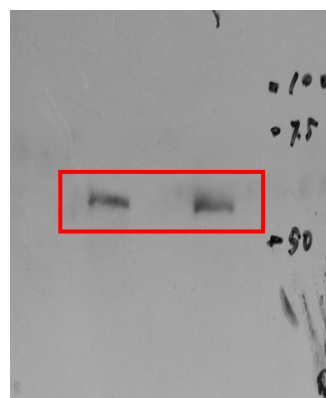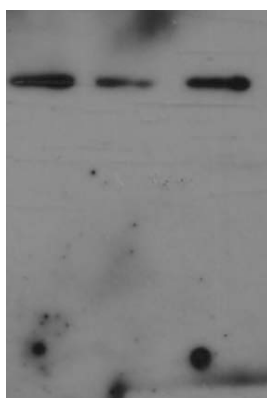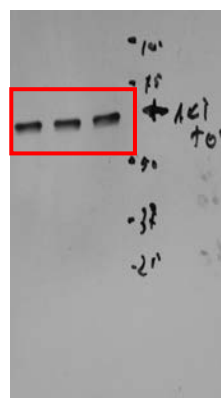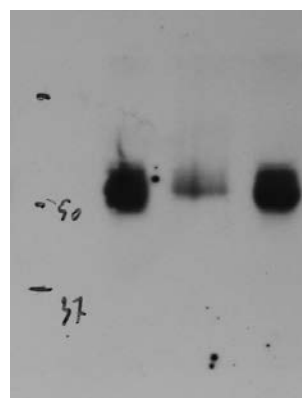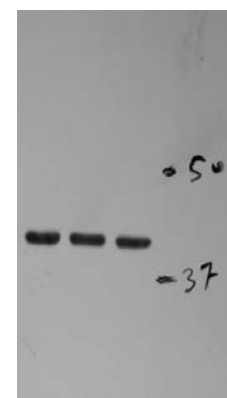

Fig. 2e right

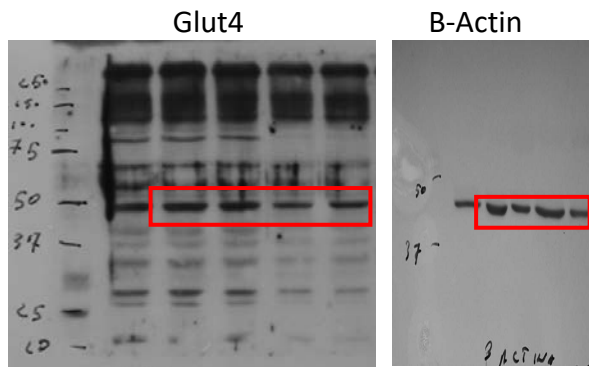

Fig. 3b

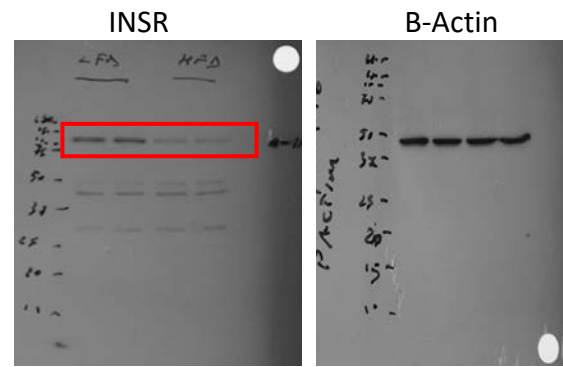

Fig. 3c

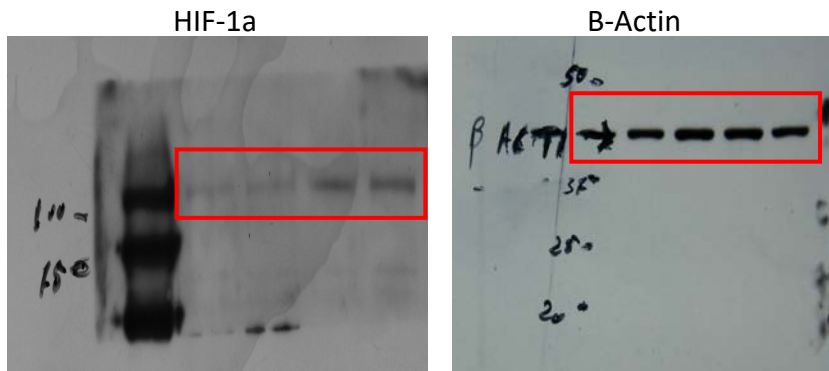

Fig. 3d left

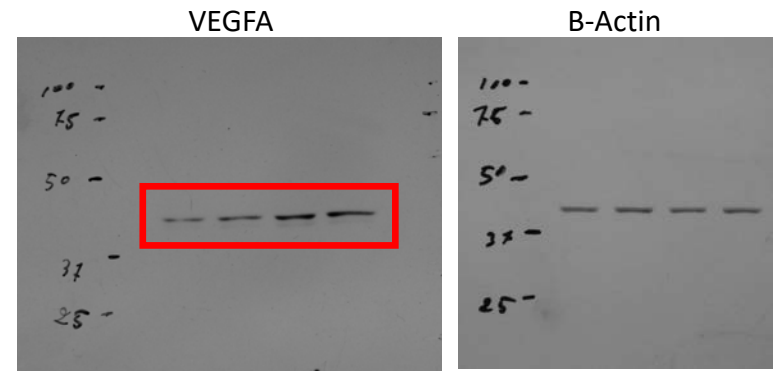

Fig. 3d right

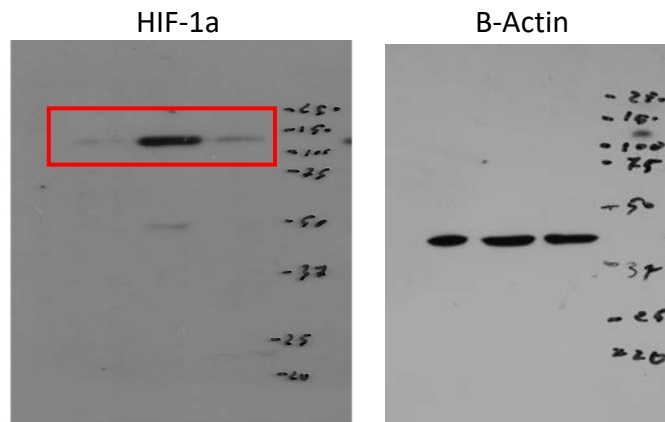

Fig. 4a left

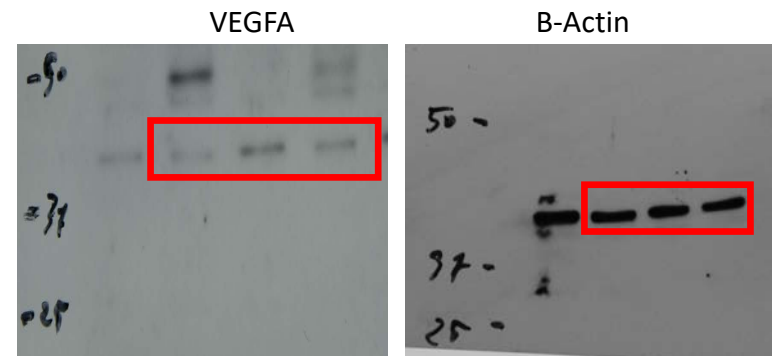

Fig. 4a right

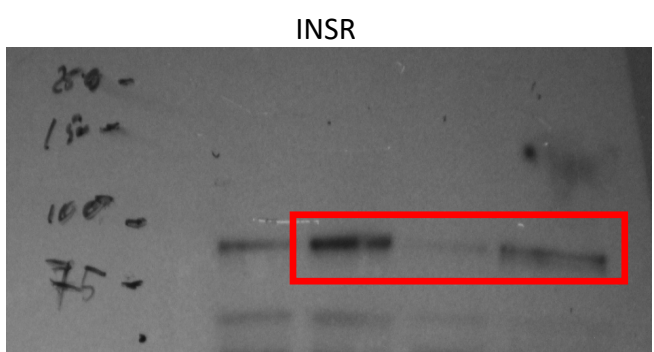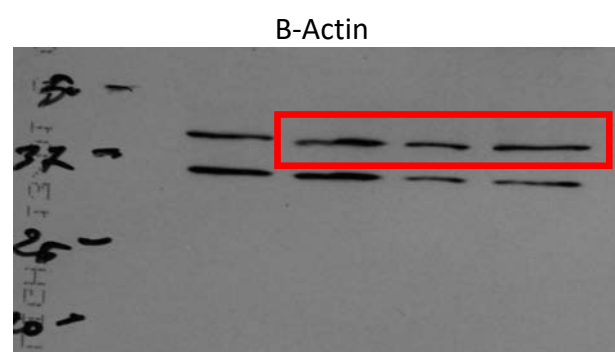

Fig. 4b left

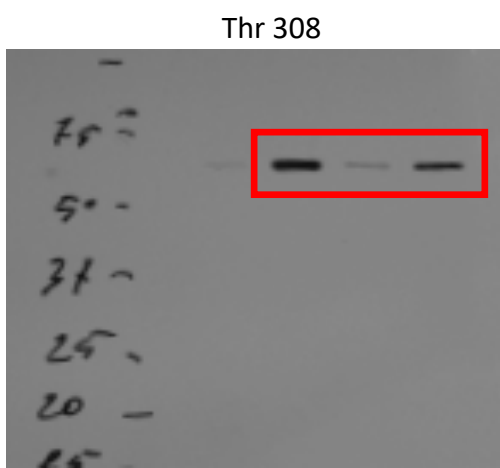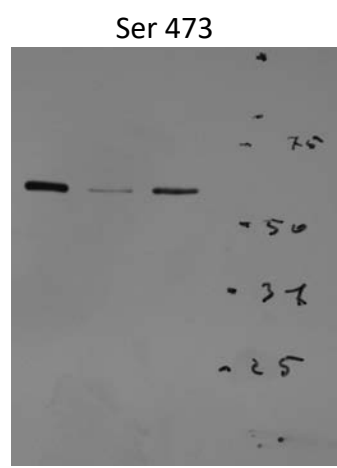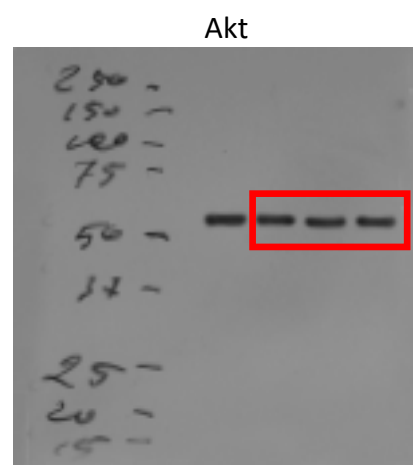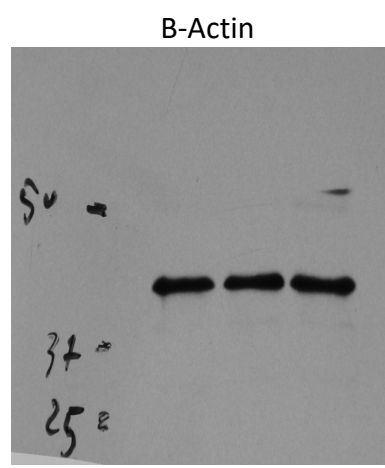

Fig. 4b right

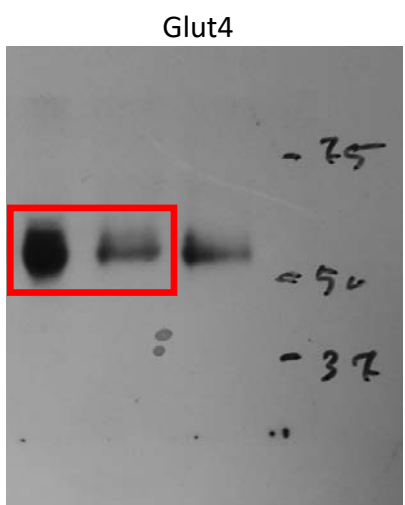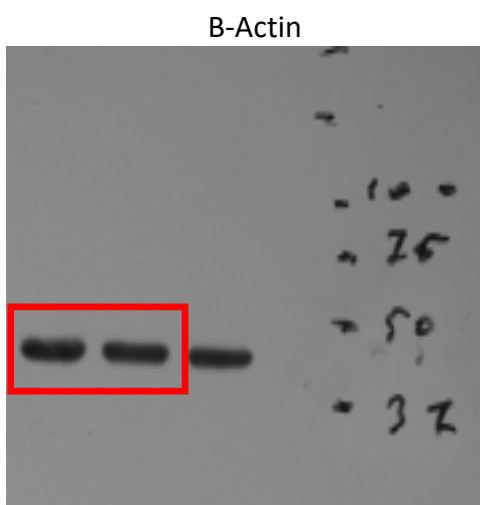

Fig. 4c

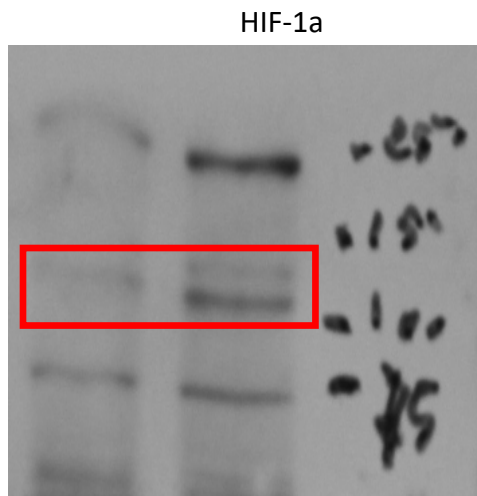

Fig. 5e

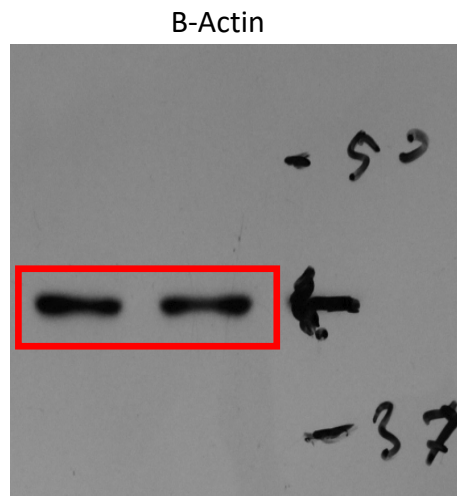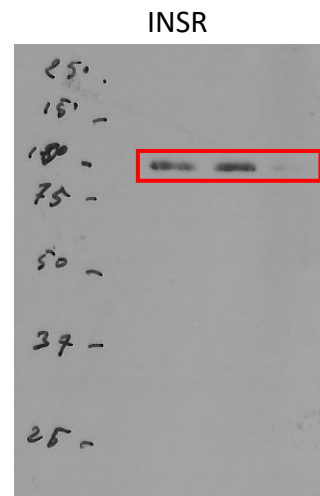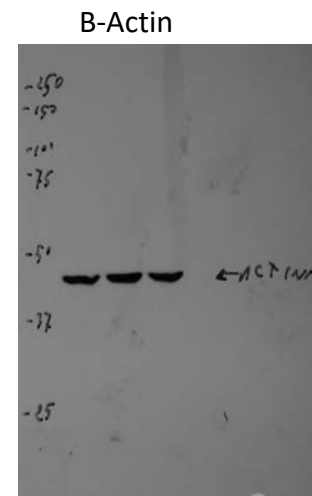

Fig. 6a left

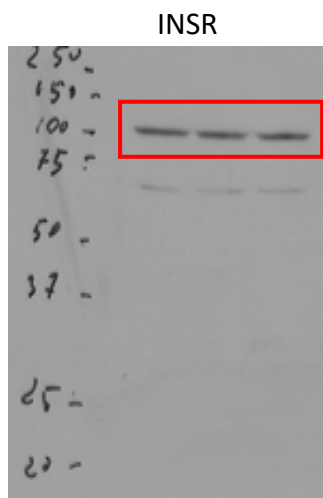

Fig. 6a right

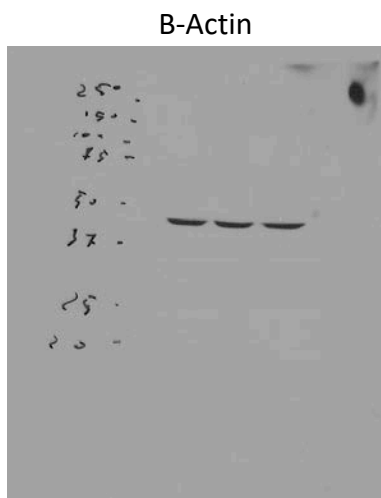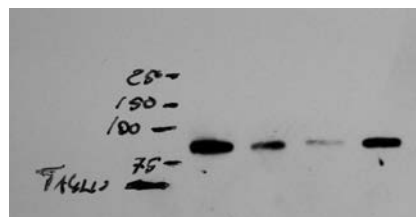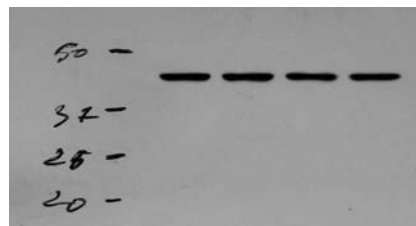

Fig. 6b
